# Supplementary material for: Omicron (BA.1) SARS-CoV-2 variant is associated with reduced risk of hospitalization and length of stay compared with Delta (B.1.617.2)
Source: bioRxiv or medRxiv preprint supplement (doi:10.1101/2022.01.20.22269406), 2022-01-25
Supplement: Supplementary file [file media-1.pdf]

**Title: Omicron (BA.1) SARS-CoV-2 variant is associated with reduced risk of hospitalization and length of stay compared with Delta (B.1.617.2)**

**Supplementary Materials**

*Equation S1 — Adjusted penalized logistic regression.*

$$Y_{(Death|X)} = \beta_0 + \beta_1 Omicron + \beta_2 age\ group + \beta_3 sex + \beta_4 reinfection + \beta_5 vaccination\ status + \varepsilon$$

Where  $Y_{(Death|X)}$  is the Odds of the outcome hospitalization conditional on covariates X (Omicron, age group, sex, previous infection and vaccine status),  $\exp(\beta_1 Omicron)$  the odds ratio for the outcome being infected with Omicron variant compared with Delta,  $\exp(\beta_2 age\ group)$  are the odds ratios for the outcome being 80 years or older, 65 years old to 80 compared with being 16 to 65 years old,  $\exp(\beta_3 sex)$  the odds ratio for the outcome being a female compared with being male,  $\exp(\beta_4 reinfection)$  is the odds ratio for the outcome of primary infection compared with reinfection,  $\exp(\beta_5 vaccination\ status)$  is the odds ratio for the outcome having incomplete, complete, or complete plus booster compared with unvaccinated,  $\varepsilon$  is the error term.

*Figure S1 — Age density per virus variant of the study population*  
Age distribution of the study population

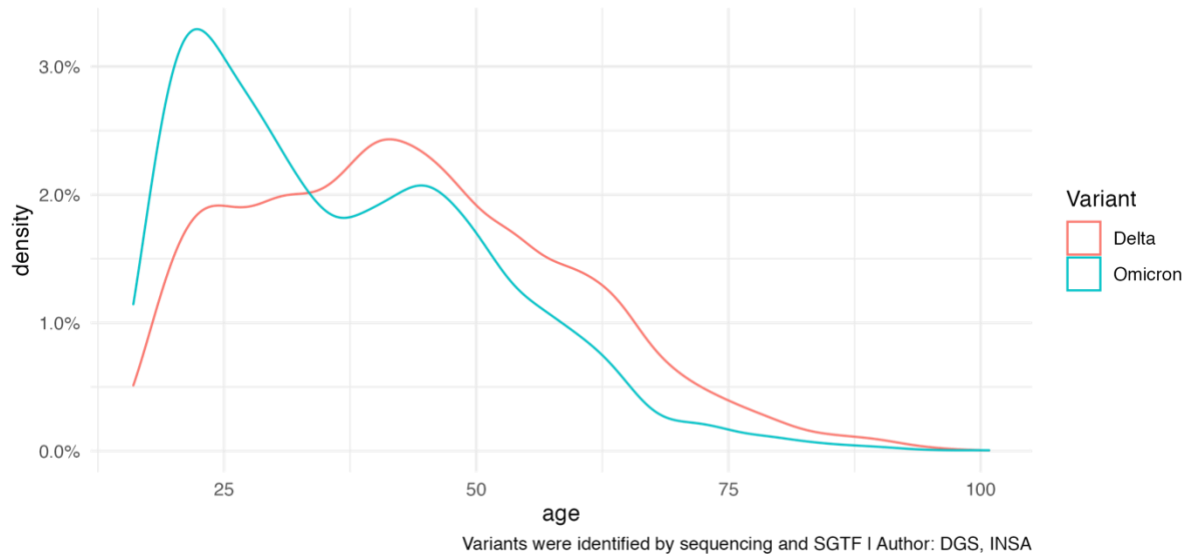

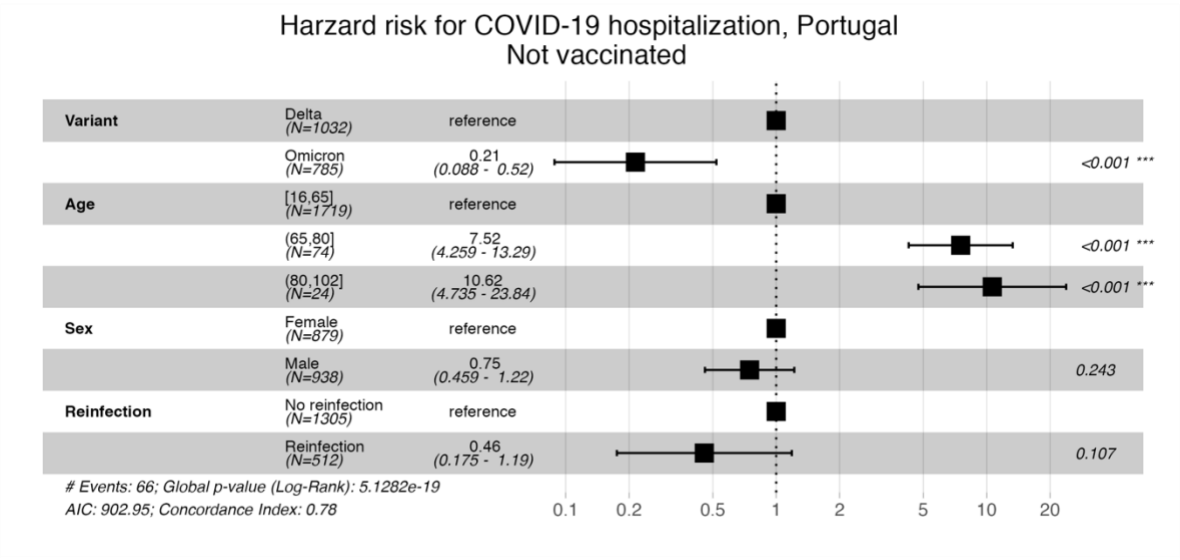

Variants were identified by sequencing and SGTF | Author: DGS, INSA

Figure S2. Hazard Ratio for hospitalization in the adjusted model stratified for not vaccinated individuals

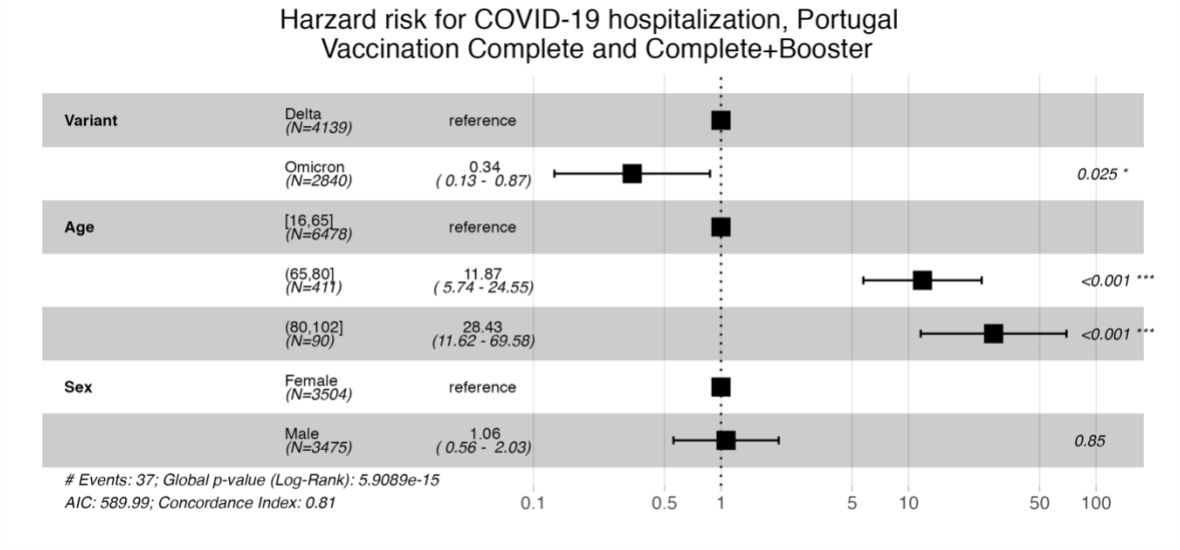

Variants were identified by sequencing and SGTF | Author: DGS, INSA

Figure S3. Hazard Ratio for hospitalization in the adjusted model stratified for vaccinated individuals

### Schoenfeld residuals of the adjusted model

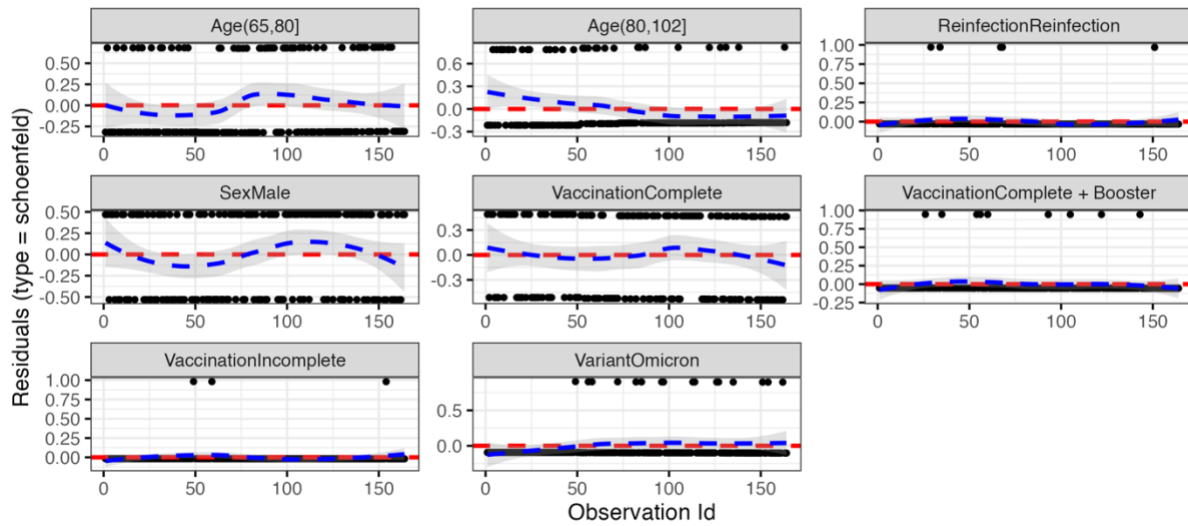

The proportional hazard assumption is supported by a non-significant relationship between residuals and time, P Value 0.08

Figure S4. Schoenfeld residuals of the adjusted model for hospitalization

Table S1. Odds Ratio for death in the adjusted model

|                    | Odds ratio | Lower CI | Upper CI   | P-value |
|--------------------|------------|----------|------------|---------|
| <b>Omicron</b>     | 0.140      | 0.001    | 1.122      | 0.069   |
| <b>Age</b>         |            |          |            |         |
| (16,65]            |            |          |            |         |
| (65,80]            | 258.531    | 32.696   | 33367.876  | <0.001  |
| (80,102]           | 4635.480   | 595.183  | 597754.200 | <0.001  |
| <b>Sex</b>         |            |          |            |         |
| Male               | 4.663      | 1.923    | 12.600     | <0.001  |
| <b>Reinfection</b> |            |          |            |         |
| Yes                | 0.273      | 0.002    | 4.030      | 0.385   |
| <b>Vaccination</b> |            |          |            |         |
| Incomplete         | 0.959      | 0.007    | 11.285     | 0.979   |
| Complete           | 0.335      | 0.131    | 0.925      | 0.036   |
| Complete + Booster | 0.046      | 0.008    | 0.195      | <0.001  |
